# Supplementary material for: In situ high-precision Ni isotope analysis of metals by femtosecond-LA-MC-ICP-MS
Source: Royal Society of Chemistry journal article supplement (doi:10.1039/c7ja00147a), 2017-01-01
Supplement: c7ja00147a1.pdf [file c7ja00147a1.pdf]

## Supplement

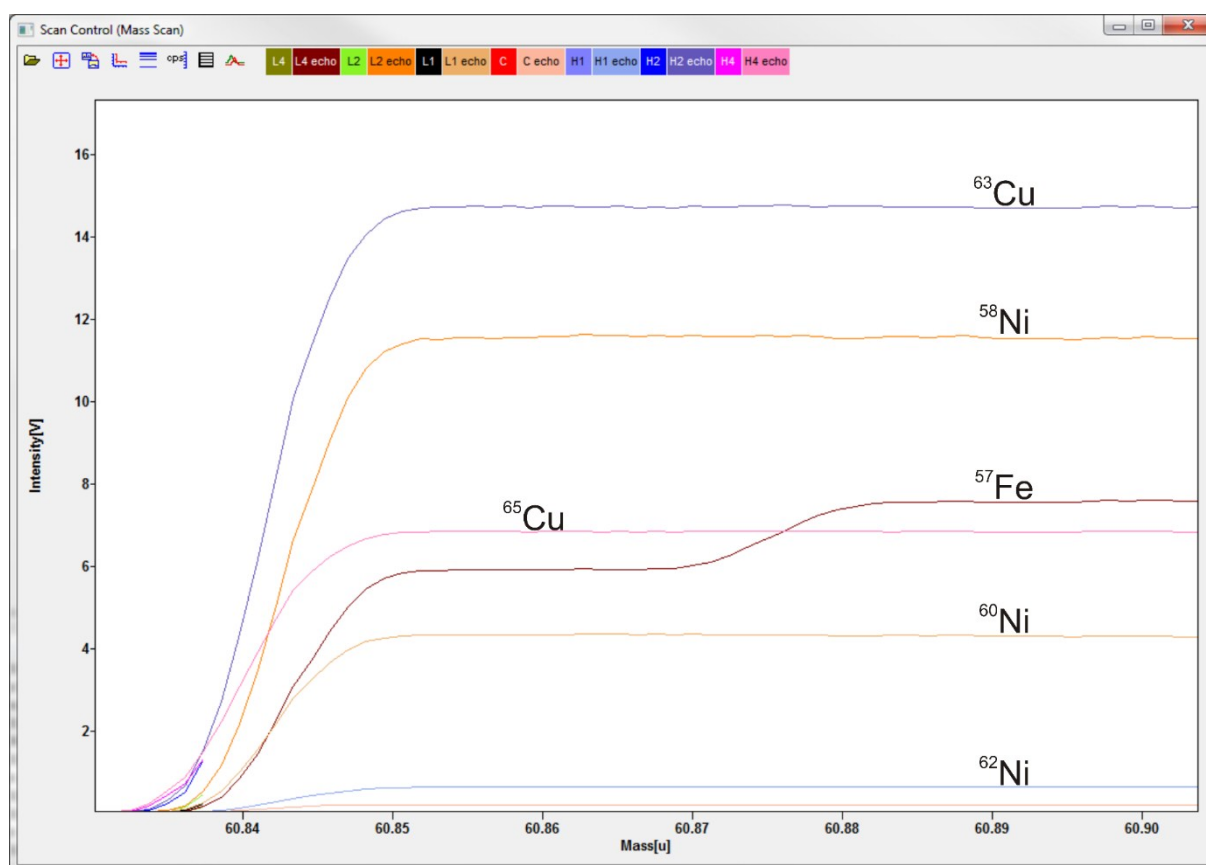

Figure S1: Image of a mass scan during *fs*-LA-MC-ICP-MS measurement on a Ni standard. The mass scan reveals that all Ni and Cu isotopes, as well as  $^{57}\text{Fe}$  can be measured free from argide or oxide interferences. The measured isotopes are written above the respective lines. The lowest line displays the intensity of  $^{61}\text{Ni}$ .

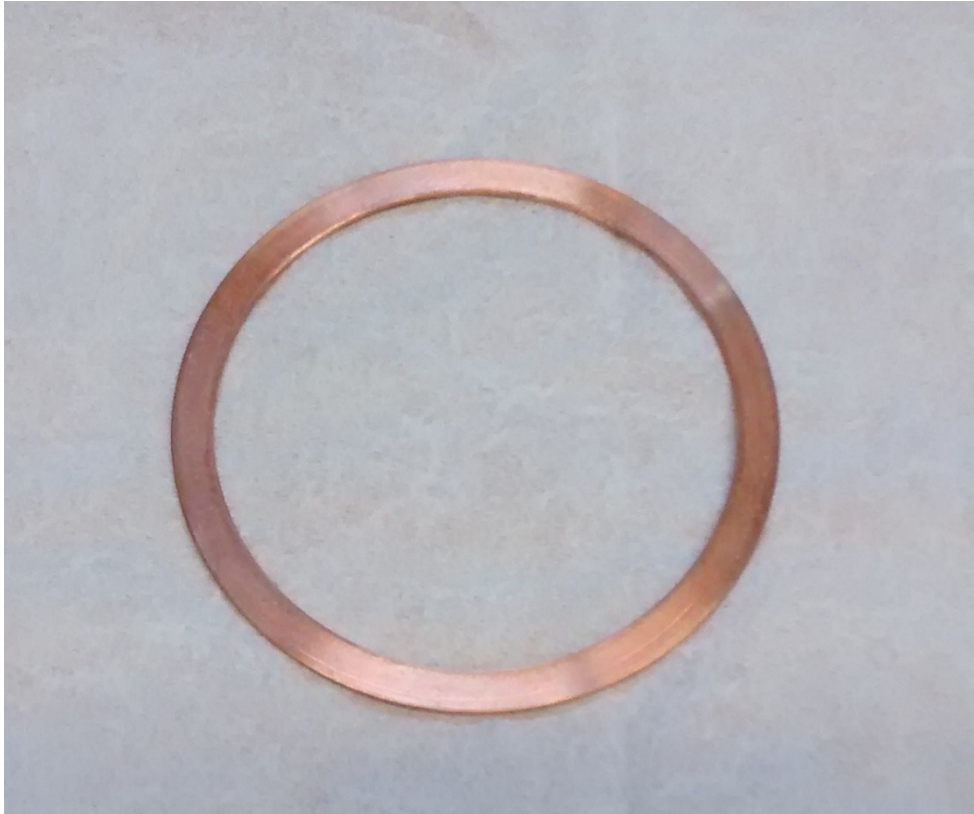

Figure S2: This photograph displays a copper spacer with a thickness of 0.8 mm. The spacer enhances the intensities by increasing the distance between the sample cone and the skimmer cone.

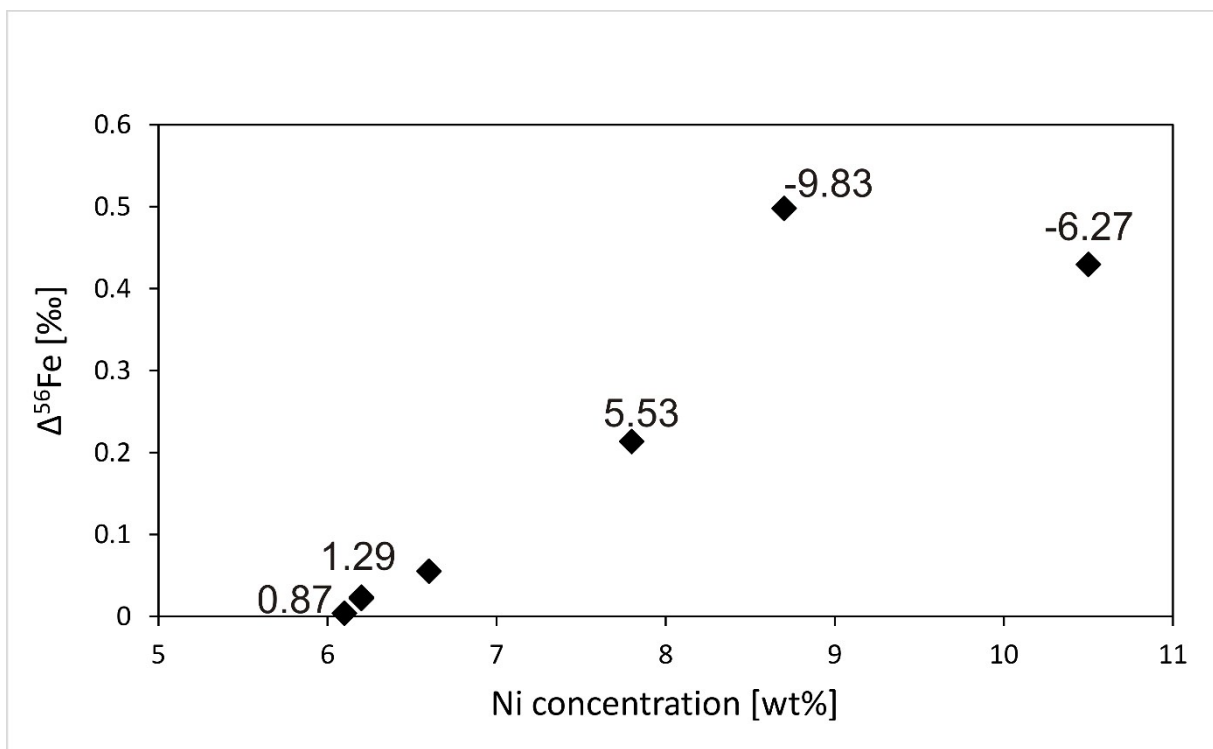

Figure S3: This diagram shows the offset of the measured  $\delta^{56}\text{Fe}$ , if the Ni mass bias was monitored simultaneously to Fe isotope analyses with LA-MC-ICP-MS, relative to an “interpolation method” for

which Ni mass bias was monitored before and after Fe isotope analyses and applied to the bracketed Fe isotope analyses (see text for further explanation). The offset, shown as  $\Delta^{56}\text{Fe}$  is plotted against the Ni concentration of the respective sample. The numbers given with the data points are the  $\delta^{62/60}\text{Ni}$  values of the grains. Samples with more than  $\sim 7$  wt% and a Ni isotope composition that differs by more than  $\sim 1.5$  ‰ from that of the Ni standard generate an offset in the analyzed Fe isotope composition ( $\Delta^{56}\text{Fe}$ ) outside the analytical uncertainty (0.1‰), i.e. for those samples, the “interpolation method” needs to be performed.

Table S1: Cup configuration of bulk solution nebulization and laser ablation MC-ICP-MS analyses for Ni.

Cup configuration for Ni isotope analyses

| cup     | L4               | L2               | L1               | C                | H1               | H2               | H4               |
|---------|------------------|------------------|------------------|------------------|------------------|------------------|------------------|
| isotope | <sup>57</sup> Fe | <sup>58</sup> Ni | <sup>60</sup> Ni | <sup>61</sup> Ni | <sup>62</sup> Ni | <sup>63</sup> Cu | <sup>65</sup> Cu |

Table S2: Typical instrument settings of the MC-ICP-MS during laser ablation measurements.

Instrumental settings of Neptune Plus for LA-MC-ICP-MS analyses

|                                               |        |
|-----------------------------------------------|--------|
| Cool gas: Ar (l min <sup>-1</sup> )           | 15     |
| Aux gas: Ar (l min <sup>-1</sup> )            | 0.86   |
| Sample gas: Ar (l min <sup>-1</sup> )         | 0.885  |
| Carrier gas: He (l min <sup>-1</sup> )        | 0.49   |
| nebulizer uptake rate (μl min <sup>-1</sup> ) | 100    |
| RF generator power (W)                        | 1210   |
| Accelerator voltage (V)                       | -10000 |
| Extraction (V)                                | 1898   |
| Focus (V)                                     | -590   |

Table S3:  $\delta^{62}\text{Ni}$  of single analyses of the Ni-rod and BAM-D184.1 measured in bracketing with NIST RM 1226 and re-calculated to SRM 986.

| $\delta^{62}\text{Ni}$ [‰] |               |                  |                  |  |
|----------------------------|---------------|------------------|------------------|--|
| BAM (RM 1226)              | BAM (SRM 986) | Ni-rod (RM 1226) | Ni-rod (SRM 986) |  |
| 0.31                       | 0.03          | -0.01            | -0.29            |  |
| 0.42                       | 0.14          | 0.02             | -0.26            |  |
| 0.29                       | 0.01          | 0.09             | -0.19            |  |
| 0.40                       | 0.13          | -0.03            | -0.31            |  |
| 0.35                       | 0.07          | 0.01             | -0.27            |  |
| 0.41                       | 0.13          | 0.02             | -0.26            |  |
| 0.36                       | 0.08          | 0.00             | -0.28            |  |
| 0.30                       | 0.02          |                  |                  |  |
| 0.37                       | 0.09          |                  |                  |  |
| 0.45                       | 0.17          |                  |                  |  |
| 0.34                       | 0.06          |                  |                  |  |

|      |      |
|------|------|
| 0.42 | 0.14 |
| 0.38 | 0.10 |
| 0.32 | 0.04 |
| 0.36 | 0.08 |
| 0.38 | 0.10 |
| 0.39 | 0.11 |
| 0.40 | 0.12 |
| 0.38 | 0.10 |
| 0.37 | 0.09 |
| 0.34 | 0.06 |
| 0.30 | 0.02 |
| 0.35 | 0.07 |
| 0.46 | 0.18 |
| 0.34 | 0.06 |
| 0.32 | 0.04 |
| 0.35 | 0.07 |
| 0.33 | 0.05 |
| 0.35 | 0.07 |
| 0.38 | 0.10 |
| 0.44 | 0.16 |
| 0.38 | 0.10 |
| 0.41 | 0.13 |
| 0.38 | 0.10 |
| 0.34 | 0.06 |
| 0.40 | 0.12 |
| 0.38 | 0.10 |
| 0.38 | 0.10 |
